# Supplementary material for: Guhong Injection Protects Against Apoptosis in Cerebral Ischemia by Maintaining Cerebral Microvasculature and Mitochondrial Integrity Through the PI3K/AKT Pathway
Source: PubMed Central journal article supplement (PMC8155598; doi:10.3389/fphar.2021.650983), 2021-05-13
Supplement: image1.pdf [file image1.pdf]

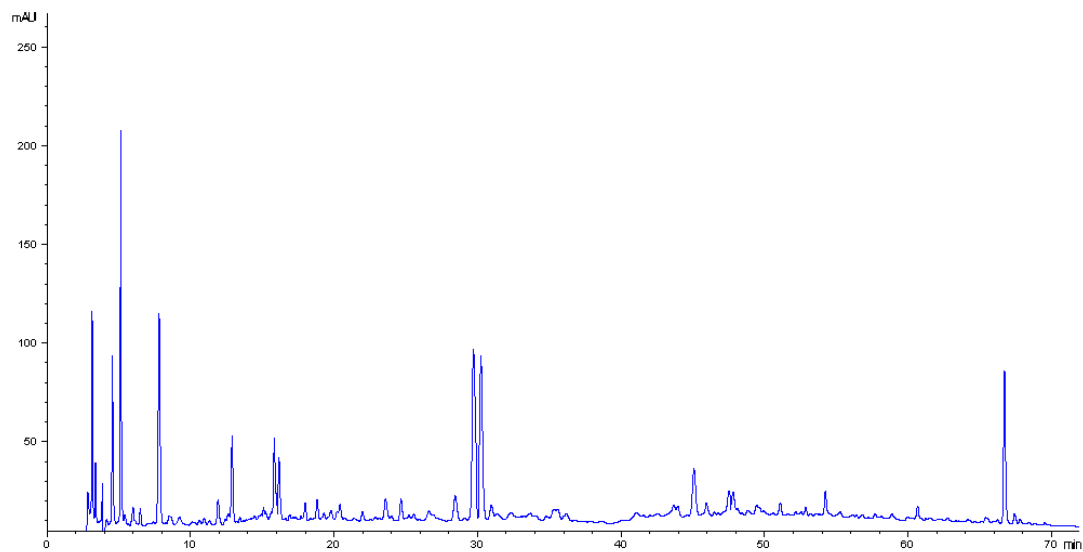

**Supplementary figure 1** Chromatogram of Guhong injection (GHI) by injection by HPLC analysis at the UV detection wavelength of 280 nm.
